# Supplementary material for: RNase E-dependent degradation of tnaA mRNA encoding tryptophanase is prerequisite for the induction of acid resistance in Escherichia coli
Source: PubMed Central journal article supplement (PMC7188888; doi:10.1038/s41598-020-63981-x), 2020-04-28
Supplement: 41598_2020_63981_MOESM1_ESM.pdf [file 41598_2020_63981_MOESM1_ESM.pdf]

**RNase E-dependent degradation of *tnaA* mRNA encoding tryptophanase is prerequisite for the induction of acid resistance in *Escherichia coli***

**Takeshi Kanda<sup>1</sup>, Genta Abiko<sup>1</sup>, Yu Kanesaki<sup>2</sup>, Hirofumi Yoshikawa<sup>3</sup>, Noritaka Iwai<sup>1</sup>, Masaaki Wachi<sup>1,\*</sup>**

<sup>1</sup>Department of Life Science and Technology, Tokyo Institute of Technology, 4259 Nagatsuta, Midori-ku, Yokohama 226-8501, Japan

<sup>2</sup>NODAI Genome Research Center, Tokyo University of Agriculture, 1-1-1 Sakuragaoka, Setagaya-ku, Tokyo 156-8502, Japan

(Present address: Research Institute of Green Science and Technology, Shizuoka University, 836 Ohya, Suruga-ku, Shizuoka 422-8529, Japan)

<sup>3</sup>Department of Bioscience, Tokyo University of Agriculture, 1-1-1 Sakuragaoka, Setagaya-ku, Tokyo 156-8502, Japan

\*Corresponding author

Email: mwachi@bio.titech.ac.jp

Tel: +81-45-924-5770

Fax: +81-45-924-5820

**Supplementary Figure S1: Relative mRNA levels of *gadE* in MG1655 and its derivative mutants at pH 8.0 or 5.5**

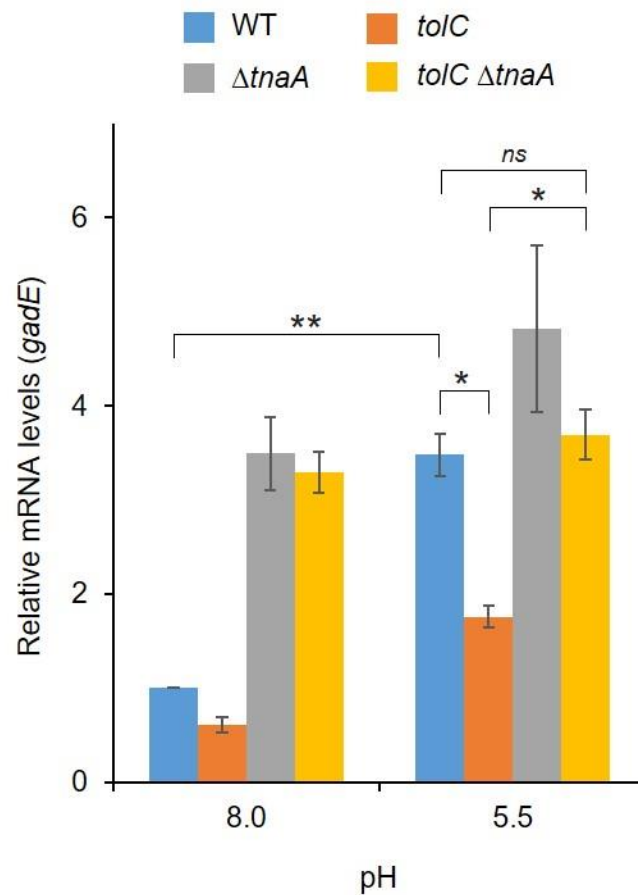

Relative mRNA levels of *gadE* in *E. coli* MG1655 (WT) and its derivative mutants grown at pH 8.0 or 5.5 were quantified using qRT-PCR. The *gadE*-mRNA levels were normalised to the reference gene transcript (16S rRNA) from the same RNA samples. Values are presented as means  $\pm$  SEM from three independent experiments ( $n = 3$ ) and were analysed using one-way ANOVA with Bonferroni post-hoc test (\* $p < 0.05$ , \*\* $p < 0.01$ ).

**Supplementary Figure S2: A whole image of the northern blot of Fig. 3b.**

|            | WT<br>(pH 8.0) |   |    | WT<br>(pH 5.5) |   |    | <i>rne-1</i><br>(pH 8.0) |   |    | <i>rne-1</i><br>(pH 5.5) |   |    |
|------------|----------------|---|----|----------------|---|----|--------------------------|---|----|--------------------------|---|----|
| Time (min) | 0              | 5 | 10 | 0              | 5 | 10 | 0                        | 5 | 10 | 0                        | 5 | 10 |

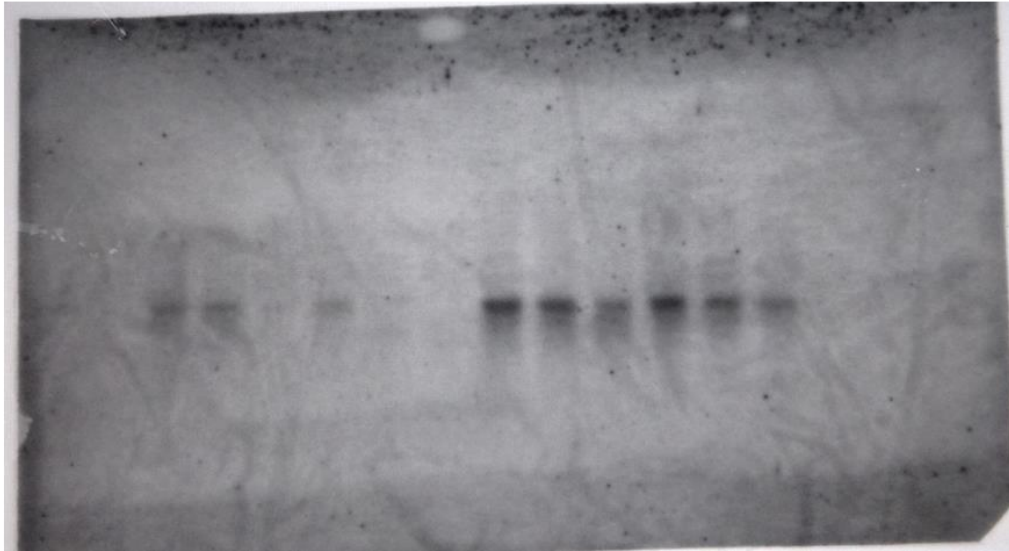

The photo was taken by a CCD camera and the image was not processed by any image processing softwares.

**Supplementary Table S1: RPKM ratios of genes encoding core enzymes and regulators of the GAD system in MG1655 and its *tolC* mutant cells at pH 8.0 or 5.5.**

| Gene        | Product                                                                                  | pH 5.5/pH 8.0 |             | <i>tolC</i> /WT |        |
|-------------|------------------------------------------------------------------------------------------|---------------|-------------|-----------------|--------|
|             |                                                                                          | WT            | <i>tolC</i> | pH 8.0          | pH 5.5 |
| <i>gadW</i> | Transcriptional activator of <i>gadA</i> and <i>gadBC</i> , and repressor of <i>gadX</i> | 11.76         | 8.70        | 0.75            | 0.55   |
| <i>gadA</i> | Glutamate decarboxylase A                                                                | 9.36          | 9.89        | 0.49            | 0.51   |
| <i>gadE</i> | GAD regulon activator                                                                    | 7.67          | 5.13        | 0.72            | 0.48   |
| <i>gadX</i> | Acid resistance regulon transcriptional activator                                        | 6.75          | 2.89        | 0.97            | 0.41   |
| <i>gadY</i> | Antisense sRNA, which positively regulates <i>gadX</i> and <i>gadW</i>                   | 6.67          | 3.14        | 1.01            | 0.47   |
| <i>dsrA</i> | Antisense sRNA, which enhances translation of <i>rpoS</i>                                | 6.55          | 3.53        | 1.96            | 1.05   |
| <i>arrS</i> | Antisense sRNA, which enhances transcription of <i>gadE</i>                              | 6.02          | 4.16        | 0.68            | 0.47   |
| <i>gadC</i> | Glutamate:gamma-aminobutyric acid antiporter                                             | 2.27          | 2.75        | 0.58            | 0.70   |
| <i>gadB</i> | Glutamate decarboxylase B                                                                | 2.13          | 2.76        | 0.56            | 0.73   |
| <i>torR</i> | Response regulator in two-component regulatory system with TorS                          | 2.07          | 2.30        | 0.93            | 1.03   |
| <i>phoP</i> | Response regulator in two-component regulatory system with PhoQ                          | 2.02          | 1.89        | 1.02            | 0.95   |
| <i>phoQ</i> | Sensory histidine kinase in two-component regulatory system with PhoP                    | 1.79          | 1.56        | 1.03            | 0.90   |
| <i>ydeO</i> | UV-inducible global regulator                                                            | 1.78          | 0.96        | 0.86            | 0.46   |
| <i>evgS</i> | Hybrid sensory histidine kinase in two-component regulatory system with EvgA             | 1.63          | 0.91        | 1.09            | 0.61   |
| <i>crp</i>  | cAMP-activated global transcription factor, which mediates catabolite repression         | 1.63          | 1.62        | 0.69            | 0.68   |
| <i>evgA</i> | Response regulator in two-component regulatory system with EvgS                          | 1.36          | 0.76        | 0.87            | 0.48   |
| <i>torS</i> | Hybrid sensory histidine kinase in two-component regulatory system with TorR             | 1.35          | 1.02        | 0.96            | 0.72   |
| <i>hns</i>  | Global DNA-binding transcriptional dual regulator                                        | 1.09          | 0.95        | 1.04            | 0.91   |
| <i>lon</i>  | DNA-binding ATP-dependent protease                                                       | 1.04          | 1.05        | 0.77            | 0.78   |
| <i>sspA</i> | Stringent starvation protein A                                                           | 1.03          | 1.08        | 0.95            | 0.98   |
| <i>mnmE</i> | tRNA U34 5-methylaminomethyl-2-thiouridine modification GTPase                           | 1.02          | 0.93        | 1.01            | 0.92   |
| <i>rpoD</i> | Sigma D (sigma 70) factor                                                                | 1.01          | 1.50        | 0.95            | 1.42   |
| <i>gcvB</i> | Antisense sRNA, which represses <i>oppA</i> , <i>dppA</i> , <i>gltI</i> and <i>livJ</i>  | 0.99          | 0.48        | 1.36            | 0.65   |
| <i>rpoS</i> | Sigma S (sigma 38) factor                                                                | 0.90          | 1.15        | 0.95            | 1.20   |
| <i>topA</i> | DNA topoisomerase I                                                                      | 0.74          | 0.68        | 0.98            | 0.90   |
| <i>rne</i>  | Endoribonuclease                                                                         | 0.72          | 0.84        | 0.83            | 0.97   |

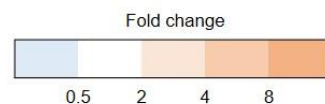

## Supplementary Table S2: RPKM ratios for representative RNA substrates of RNase

**E upon acid treatment in MG1655 cells.**

| Gene        | Product                                                          | pH 5.5/pH 8.0 (WT) | Reference |
|-------------|------------------------------------------------------------------|--------------------|-----------|
| <i>dnaG</i> | DNA primase                                                      | 0.86               | 1         |
| <i>ompA</i> | Outer membrane protein A                                         | 1.14               | 2         |
| <i>ptsG</i> | Glucose-specific PTS enzyme, IIB component                       | 1.63               | 3         |
| <i>rne</i>  | Endoribonuclease E                                               | 0.72               | 4         |
| <i>rpsO</i> | 30S ribosomal subunit protein S15                                | 0.93               | 5         |
| <i>rpsT</i> | 30S ribosomal subunit protein S20                                | 0.84               | 6         |
| <i>ryhB</i> | sRNA antisense regulator mediating positive Fur regulon response | 1.29               | 2         |

PTS, phosphoenolpyruvate: carbohydrate phosphotransferase system

**Supplementary Table S3: RPKM ratios of genes encoding *tna*-operon regulators upon acid treatment in MG1655 and its *tolC* mutant cells.**

| Gene        | Product                                                                       | pH 5.5/pH 8.0 |             | Reference |
|-------------|-------------------------------------------------------------------------------|---------------|-------------|-----------|
|             |                                                                               | WT            | <i>tolC</i> |           |
| <i>torS</i> | Hybrid sensory histidine kinase in two-component regulatory system with TorR  | 1.35          | 1.02        | 7         |
| <i>torR</i> | Response regulator in two-component regulatory system with TorS               | 2.07          | 2.30        | 7         |
| <i>torI</i> | Response regulator inhibitor for <i>tor</i> operon                            | 1.07          | 0.45        | 8         |
| <i>crp</i>  | cAMP-activated global transcription factor, mediator of catabolite repression | 1.63          | 1.62        | 9         |
| <i>cyaA</i> | Adenylate cyclase                                                             | 1.20          | 1.51        | 10        |

#### Supplementary Table S4: Bacterial strains used in this study.

| Strain  | Relevant genetic marker(s)        | Donor (Reference)                       | Source or reference |
|---------|-----------------------------------|-----------------------------------------|---------------------|
| MG1655  | Wild type                         |                                         | Laboratory stock    |
| MG1655T | MG1655 <i>tolC::Tn10</i>          |                                         | 11                  |
| TK20    | MG1655 $\Delta$ <i>tnaA::kan</i>  | JW3686 (Keio collection <sup>12</sup> ) | This study          |
| TK12    | MG1655T $\Delta$ <i>tnaA::kan</i> | JW3686 (Keio collection <sup>12</sup> ) | This study          |
| TK30    | MG1655 <i>rng::cat</i>            | GW11 <sup>13</sup>                      | This study          |
| TK40    | MG1655 <i>rne-1</i>               | GW20 <sup>13</sup>                      | This study          |
| TK34    | TK30 <i>rne-1</i>                 | GW20 <sup>13</sup>                      | This study          |
| TK50    | MG1655 <i>hfq10::cat</i>          | HAT10 <sup>14</sup>                     | This study          |
| TK60    | MG1655 <i>rne-105 (smb-105)</i>   | BZ5 <sup>15</sup>                       | This study          |

Mutant strains were constructed by P1 phage-mediated transduction using MG1655 or its derivatives as acceptors and strains carrying the appropriate mutations as donors.

**Supplementary Table S5: DNA primers used for qRT-PCR analysis.**

| Target gene | 5' primer sequence (5'→3') | 3' primer sequence (5'→3') | Reference  |
|-------------|----------------------------|----------------------------|------------|
| 16S rRNA    | GTTAATACCTTTGCTCATTGA      | ACCAGGGTATCTAATCCTGTT      | 16         |
| <i>gadA</i> | TTACCAGGTTGCCGCTTATC       | ACGCAGACGTTTCAGAGAGGT      | 17         |
| <i>tnaA</i> | CTTTAAACATCTCCCTGAACCGTTC  | GTGCCGCTGTCGGTCAGTAAATCG   | This study |
| <i>gadE</i> | CTTTTCTTTTACAGGGCTTTTGGCAG | CGCTTCTTCATCAAGGATATGATTG  | This study |
| <i>me</i>   | GAATGTTAATCAACGCAACTCAGC   | GGTTC AATGCGGGTGATTTTAC    | This study |
| <i>rng</i>  | CTGAATTGTTAGTAAACGTAACGCC  | AAGTACACGACTTACACGACCCTTG  | This study |



## Supplementary references

1. Yajnik, V. & Godson, G. N. Selective decay of *Escherichia coli* *dnaG* messenger RNA is initiated by RNase E. *J. Biol. Chem.* **268**, 13253–13260 (1993).
2. Moll, I., Afonyushkin, T., Vytvytska, O., Kaberdin, V. R. & Bläsi, U. Coincident Hfq binding and RNase E cleavage sites on mRNA and small regulatory RNAs. *RNA* **9**, 1308–1314 (2003).
3. Kimata, K., Tanaka, Y., Inada, T. & Aiba, H. Expression of the glucose transporter gene, *ptsG*, is regulated at the mRNA degradation step in response to glycolytic flux in *Escherichia coli*. *EMBO J.* **20**, 3587–3595 (2001).
4. Jain, C. & Belasco, J. G. RNase E autoregulates its synthesis by controlling the degradation rate of its own mRNA in *Escherichia coli*: unusual sensitivity of the *rne* transcript to RNase E activity. *Genes Dev.* **9**, 84–96 (1995).
5. Braun, F., Hajnsdorf, E. & Régnier, P. Polynucleotide phosphorylase is required for the rapid degradation of the RNase E-processed *rpsO* mRNA of *Escherichia coli* devoid of its 3' hairpin. *Mol. Microbiol.* **19**, 997–1005 (1996).
6. Coburn, G. A. & Mackie, G. A. Reconstitution of the degradation of the mRNA for ribosomal protein S20 with purified enzymes. *J. Mol. Biol.* **279**, 1061–1074 (1998).

7. Bordi, C., Théraulaz, L., Méjean, V. & Jourlin-Castelli, C. Anticipating an alkaline stress through the Tor phosphorelay system in *Escherichia coli*. *Mol. Microbiol.* **1**, 211–223 (2003).
8. Ansaldi, M., Théraulaz, L., & Méjean, V. TorI, a response regulator inhibitor of phage origin in *Escherichia coli*. *Proc. Natl. Acad. Sci.* **25**, 9423–9428 (2004).
9. Deeley, M. C. & Yanofsky, C. Transcription initiation at the tryptophanase promoter of *Escherichia coli* K-12. *J. Bacteriol.* **2**, 942–951 (1982).
10. Görke, B. & Stülke, J. Carbon catabolite repression in bacteria: many ways to make the most out of nutrients. *Nat. Rev. Microbiol.* **8**, 613–624 (2008).
11. Deininger, K. N. W. *et al.* A requirement of TolC and MDR efflux pumps for acid adaptation and GadAB induction in *Escherichia coli*. *PLoS One* **6**, e18960 (2011).
12. Baba, T. *et al.* Construction of *Escherichia coli* K-12 in-frame, single-gene knockout mutants: the Keio collection. *Mol. Syst. Biol.* **2**, 2006.0008 (2006).
13. Wachi, M., Umitsuki, G. & Nagai, K. Functional relationship between *Escherichia coli* RNase E and the CafA protein. *Mol. Gen. Genet.* **253**, 515–519 (1997).
14. Wachi, M., Takada, A. & Nagai, K. Overproduction of the outer-membrane proteins FepA and FhuE responsible for iron transport in *Escherichia coli* *hfq::cat*

- mutant. *Biochem. Biophys. Res. Commun.* **264**, 525–529 (1999).
15. Kido, M. *et al.* RNase E polypeptides lacking a carboxyl-terminal half suppress a *mukB* mutation in *Escherichia coli*. *J. Bacteriol.* **178**, 3917–3925 (1996).
16. Gao, W., Zhang, W. & Meldrum, D. R. RT-qPCR based quantitative analysis of gene expression in single bacterial cells. *J. Microbiol. Methods* **85**, 221–227 (2011).
17. Chattopadhyay, M. K., Keembiyehetty, C. N., Chen, W. & Tabor, H. Polyamines stimulate the level of the  $\sigma^{38}$  subunit (RpoS) of *Escherichia coli* RNA polymerase, resulting in the induction of the glutamate decarboxylase-dependent acid response system via the *gadE* regulon. *J. Biol. Chem.* **290**, 17809–17821 (2015).
